# Supplementary material
Source: MDPI journal article supplement (https://www.mdpi.com/2304-6767/11/6/143)
Supplement: s1 [file s1]

## SUPPLEMENTARY MATERIAL

**Table 1.** Detailed characteristics of studies included in the qualitative synthesis.

| Trial ID                  | Study design         | Intervention                                                                                                                                                                          | Pterygomaxillary disjunction (PMD) | Distractor                                                           | Activation time                                                                                    | Number of patients | Mean age | Sex (M/F) | Malocclusion                                                             | Measuring method                          | Timepoints                                                                                                                            |
|---------------------------|----------------------|---------------------------------------------------------------------------------------------------------------------------------------------------------------------------------------|------------------------------------|----------------------------------------------------------------------|----------------------------------------------------------------------------------------------------|--------------------|----------|-----------|--------------------------------------------------------------------------|-------------------------------------------|---------------------------------------------------------------------------------------------------------------------------------------|
| Aras et al. (2010)        | prospective cohort   | SARME - TPD (disjunction of zygomaticoalveolar crest, anterior surface of the maxillary sinus, and anterior nasal spinal, respectively, in lateral, anterior, and median osteotomies) | no                                 | Transpalatal Distractor, SurgiTec NV (Bruges, Belgium)               | 1 mm/day (7 - 10 days)                                                                             | 11                 | 27.3     | 5/6       | maxillary transverse deficiency and partial/near total nasal obstruction | CT                                        | T1 (baseline)<br>T2 (6.7 ± 2.3 months after surgical intervention, at expander removal)<br>T3 (12 - 15 months after expander removal) |
| Aras et al. (2017)        | retrospective cohort | SARME - TPD (horizontal osteotomies from the piriform aperture to the pterygomaxillary suture, additional vertical midline osteotomy between the upper central incisors)              | no                                 | Transpalatal Distractor, SurgiTec NV (Bruges, Belgium)               | 1 mm/day (7 - 10 days)                                                                             | 16                 | 27.4     | 9/7       | posterior crossbite                                                      | lateral cephalometric radiographs         | T1 (baseline)<br>T2 (after expansion - before any further ortho treatment)                                                            |
| Asscherickx et al. (2016) | prospective cohort   | SARME (standard corticotomies of the anterior, lateral, and median bony supports of the maxilla and midpalatal suture separation)                                                     | no                                 | Transpalatal Distractor, SurgiTec NV (Bruges, Belgium)               | 1 mm/3 days (8 - 22 days)                                                                          | 21                 | 26.5     | 6/15      | maxillary transverse deficiency                                          | study casts, posteroanterior cephalograms | T1 (baseline)<br>T2 (end of expansion)<br>T3 (10 weeks after T2)                                                                      |
| Barone et al. (2020)      | prospective cohort   | SARME (LeFort I and intermaxillary suture osteotomy, separation of the midline and a nasal septum osteotomy)                                                                          | no                                 | RPE® expander (KLS Martin, Tuttlingen, Germany)                      | 1 mm/day                                                                                           | 12                 | NA       | NA        | maxillary mandibular transverse discrepancy > 5 mm                       | virtual study models from dental casts    | T1 (baseline)<br>T2 (1 year post-operatively)                                                                                         |
| Dowgierd et al. (2018)    | retrospective cohort | SARME (Le Fort I, through the posterior maxillary surface, the zygomatic alveolar crest, anterior wall of the maxillary sinus and edge of the piriform aperture)                      | yes                                | Titamed Smile Distractor                                             | approx. 0.6 mm/day                                                                                 | 78                 | 16.86    | NA        | maxillary narrowing with a deficit of the transverse dimension > 4 mm    | CBCT, lateral cephalograms                | T1 (baseline)<br>T2 (3 months post distraction)                                                                                       |
| Haas Junior et al. (2022) | prospective cohort   | SARME (four minimally invasive osteotomies, one subspinal, one vertical midline extended to the nasal floor and two horizontal lateral osteotomies)                                   | no                                 | MARPE expander with four bicortical miniscrews                       | 2 turns/day until appearance of an interincisal diastema, then 1 turn/day until required expansion | 11                 | 38.89    | 3/8       | established diagnosis of transverse maxillary deficiency                 | superimposed CBCT images                  | T1 (baseline)<br>T2 (after expansion - before any further ortho treatment)                                                            |
| Hansen et al. (2007)      | prospective cohort   | SARME (bilateral osteotomy of the maxillary sinus, pre-formation of the premaxilla above the central incisors)                                                                        | yes                                | Dresden distractor                                                   | 0.96 mm/day (7 days)                                                                               | 12                 | 25.3     | NA        | serious transverse maxillary constriction                                | CT                                        | T1 (baseline)<br>T2 (post expansion)                                                                                                  |
| Huizinga et al. (2018)    | retrospective cohort | SARME (corticotomies of all four bony supports of the maxilla)                                                                                                                        | yes                                | TPD (Classic or All-in-one, Surgi-Tec, Sint-Denijs-Westrem, Belgium) | 0.33 - 0.66 mm/day                                                                                 | 20                 | 24.5     | 12/8      | transversal maxillary hypoplasia                                         | CBCT                                      | T1 (baseline)<br>T2 (post expansion)                                                                                                  |
| Koudstaal et al. (2009)   | RCT                  | SARME (LeFort I)                                                                                                                                                                      | no                                 | Transpalatal Distractor, SurgiTec NV                                 | 1 mm/day                                                                                           | 23 (25 randomized) | 33       | 10/15     | transverse maxillary hypoplasia                                          | lateral and PA cephalograms, casts        | T1 (baseline)<br>T2 (post expansion)<br>T3 (12 months)                                                                                |

|                        |                                      |                                                                              |                                               |                                                                                                           |                           |                               |      |       |                                                                                                                                                    |                                                                                                                                        |                                                                                                                                        |
|------------------------|--------------------------------------|------------------------------------------------------------------------------|-----------------------------------------------|-----------------------------------------------------------------------------------------------------------|---------------------------|-------------------------------|------|-------|----------------------------------------------------------------------------------------------------------------------------------------------------|----------------------------------------------------------------------------------------------------------------------------------------|----------------------------------------------------------------------------------------------------------------------------------------|
|                        |                                      |                                                                              |                                               | (Bruges, Belgium or RPE® expander (KLS Martin, Tuttlingen, Germany))                                      |                           |                               |      |       |                                                                                                                                                    |                                                                                                                                        | after treatment)                                                                                                                       |
| Kunz et al. (2016)     | retrospective cohort                 | SARME (subtotal Le Fort I)                                                   | yes (partial separation of pterygoid process) | Transpalatal Distractor, SurgiTec NV (Bruges, Belgium or RPE® expander (KLS Martin, Tuttlingen, Germany)) | 0.66 mm/day (2 - 3 weeks) | 16                            | 26.5 | 6-10  | pronounced transverse deficit of the maxilla combined with uni- or bilateral posterior crossbite                                                   | 3D models dental casts                                                                                                                 | T1 (baseline) T2 (5.6 ± 3.5 months post distraction)                                                                                   |
| Landes et al. (2009a)  | retrospective and prospective cohort | SARME (Tripartite or bipartite osteotomies)                                  | yes/no                                        | MWD (Normed, Tuttlingen, Germany) or TPD (Surgi-Tec, Bruges, Belgium)                                     | 0.5 - 0.6 mm/day          | 8 (bipartite) 11 (tripartite) | NA   | NA    | transverse maxillary compression, dental crowding, lack of adequate dentoalveolar basis                                                            | 3D-CT scans                                                                                                                            | T1 (baseline) T2 (post expansion)                                                                                                      |
| Landes et al. (2009b)  | retrospective and prospective cohort | SARME (Tripartite or bipartite osteotomies)                                  | yes/no                                        | MWD (Normed, Tuttlingen, Germany) or TPD (Surgi-Tec, Bruges, Belgium)                                     | 0.5 - 0.6 mm/day          | 24 (50)                       | NA   | NA    | transverse maxillary compression, dental crowding, lack of adequate dentoalveolar basis                                                            | 3D-CT scans                                                                                                                            | T1 (baseline) T2 (post expansion)                                                                                                      |
| Laudeman et al. (2009) | retrospective and prospective cohort | SARME (LeFort I, tripartite or bipartite osteotomies)                        | yes/no                                        | MWD (Normed, Tuttlingen, Germany) or TPD (Surgi-Tec, Bruges, Belgium)                                     | 0.5 - 0.6 mm/day          | 24                            | NA   | NA    | transverse maxillary compression, dental crowding, or lack of dentoalveolar basis                                                                  | 3D-CT scans                                                                                                                            | T1 (baseline) T2 (4 - 26 weeks post expansion)                                                                                         |
| Laudeman et al. (2010) | retrospective cohort                 | SARME (LeFort I, tripartite or bipartite osteotomies)                        | yes/no                                        | MWD (Normed, Tuttlingen, Germany) or TPD (Surgi-Tec, Bruges, Belgium)                                     | 0.5 - 0.6 mm/day          | 18                            | NA   | NA    | insufficient dentoalveolar basis and a transverse maxillomandibular deficit of > 5 mm                                                              | 3D scanned cast models                                                                                                                 | T1 (baseline) T2 (20.5 ± 1.34 months post-expansion)                                                                                   |
| Laudeman et al. (2011) | retrospective and prospective cohort | SARME (LeFort I, tripartite or bipartite osteotomies)                        | yes/no                                        | MWD (Normed, Tuttlingen, Germany) or TPD (Surgi-Tec, Bruges, Belgium)                                     | 0.5 - 0.6 mm/day          | 25                            | NA   | NA    | transverse maxillary deficiency, dental crowding or lack of dentoalveolar basis                                                                    | 3D-CT scans                                                                                                                            | T1 (baseline) T2 (2.87 ± 1.59 months post-expansion)                                                                                   |
| Matteini et al. (2001) | prospective cohort                   | SARME (standard osteotomies)                                                 | yes                                           | TPD                                                                                                       | 0.33 mm/day               | 20                            | 20   | 8/12  | transverse maxillary deficiency (lateroposterior crossbite)                                                                                        | Models                                                                                                                                 | T1 (before surgery) T2 (post expansion, 2 - 3 weeks later)                                                                             |
| Nada et al. (2012)     | prospective cohort                   | SARME (LeFort I, additional midline osteotomy)                               | yes                                           | TPD (Surgi-Tec, Bruges, Belgium)                                                                          | 1 mm/day                  | 17                            | 29.4 | NA    | skeletal transverse maxillary deficiency combined with another skeletal discrepancy that required orthognathic surgical intervention               | 3D CBCT models                                                                                                                         | T1 (baseline), T2 (22 ± 7 months after completion of pre-surgical orthodontic treatment and prior to second orthognathic intervention) |
| Nada et al. (2013)     | prospective cohort                   | SARME (LeFort I, additional midline osteotomy)                               | yes                                           | TPD (Surgi-Tec, Bruges, Belgium)                                                                          | 1 mm/day                  | 15                            | 30   | 7/8   | developmental deformity, absence of more than four teeth in the posterior maxillary arch, and lips not being in rest position during the CBCT scan | 3D CBCT models                                                                                                                         | T1 (baseline) T2 (22 ± 7 months after completion of pre-surgical orthodontic treatment)                                                |
| Nikolaev et al. (2017) | retrospective cohort                 | SARME                                                                        | NA                                            | NA                                                                                                        | NA                        | 21                            | NA   | NA    | NA                                                                                                                                                 | CBCT                                                                                                                                   | T1 (baseline) T2 (day of the expander removal)                                                                                         |
| Parhiz et al. (2011)   | retrospective cohort                 | SARME (Mid-palatal osteotomy with Le Fort I osteotomy and nasal disjunction) | yes                                           | TPD (SurgiTec, Bruges, Belgium)                                                                           | 0.33 mm/day               | 50                            | 26   | 20/30 | transverse maxillary deficiency                                                                                                                    | posteroanterior (PA) and lateral cephalograms, panoramic and periapical radiographs, intraoral and extraoral photographs, study models | T1 (baseline) T2 (20 ± 9 months)                                                                                                       |

|                         |                      |                                                                                                                                                                                                                                           |                                            |                                                                                                                      |                                                                       |                      |                        |                        |                                                                                                                              |                                                  |                                                                                                                                |
|-------------------------|----------------------|-------------------------------------------------------------------------------------------------------------------------------------------------------------------------------------------------------------------------------------------|--------------------------------------------|----------------------------------------------------------------------------------------------------------------------|-----------------------------------------------------------------------|----------------------|------------------------|------------------------|------------------------------------------------------------------------------------------------------------------------------|--------------------------------------------------|--------------------------------------------------------------------------------------------------------------------------------|
| Petrick et al. (2011)   | prospective cohort   | SARME (lateral osteotomy)                                                                                                                                                                                                                 | no                                         | Dresden Distractor (DD; ITU, Dresden, Germany)                                                                       | 1 mm/day (8 days)                                                     | 16                   | 24.5                   | 7/9                    | transverse maxillary deficiency                                                                                              | CT                                               | T1 (baseline)<br>T2 (on average 7.01 months after SARME)                                                                       |
| Pinto et al. (2001)     | prospective cohort   | SARME (osteotomies)                                                                                                                                                                                                                       | no                                         | TPD (Surgi-Tec, Bruges, Belgium)                                                                                     | 0.33 mm/day                                                           | 20                   | 21.5                   | 9/11                   | NA                                                                                                                           | Digital photographs of the models (dental casts) | T1 (baseline)<br>T2 (end of expansion)                                                                                         |
| Ploder et al. (2021)    | retrospective cohort | SARME (corticotomies of the anterior, lateral and medial bony supports of the maxilla)                                                                                                                                                    | yes                                        | TPD (Surgi-Tec, Bruges, Belgium) or OMI appliance (Micro-4 Hyrax appliance (MICRO4), Tiger Dental, Bregenz, Austria) | TPD: 1 mm/day (12.6 ± 5.8 days)<br>OMI: 0.51 mm/day (12.5 ± 1.3 days) | 12 (TPD)<br>13 (OMI) | TPD: 24.8<br>OMI: 36.1 | TPD : 5/7<br>OMI : 4/9 | transverse maxillary deficiency (dental crossbite, crowding, constricted maxillary arch, maxillary width discrepancy > 5 mm) | Cast models<br>Panoramic radiographs             | T1 (before surgery, 1-7 days)<br>T2 (after consolidation period, 8- 10 weeks)<br>T3 (1 year after surgery, range 10-14 months) |
| Seeberger et al. (2015) | prospective cohort   | SARME (LeFort I, including osteotomy of the pterygoid process)                                                                                                                                                                            | yes                                        | Titamed Uni-Smile Distractor (Wervik, Belgium)                                                                       | 0.5 mm/day                                                            | 19                   | 22                     | 8/11                   | transverse maxillary deficiency                                                                                              | CBCT                                             | T1 (1 month before)<br>T2 (3 months after surgery)                                                                             |
| Tausche et al. (2007)   | prospective cohort   | SARME (bilateral osteotomy of the lateral maxillary sinus walls)                                                                                                                                                                          | no                                         | DD - Dresden Distractor                                                                                              | over-compensation of 0.5-1 mm (8-10 days)                             | 17                   | 28.8                   | 6/11                   | severely constricted upper jaw in conjunction with an Angle Class II, Class III or open bite malocclusion                    | CT                                               | T1 (before)<br>T2 (6 months after insertion of DD)                                                                             |
| Wallner et al. (2022)   | retrospective cohort | SARME (Le Fort I, midline osteotomy)                                                                                                                                                                                                      | yes                                        | Titamed SMILE 3-distractor (Kontich, Belgium)                                                                        | 0.5 mm/day (0.25 mm twice a day) for 14 days                          | 91                   | 20                     | 33/58                  | transverse maxillary deficiency (loss of at least 5 mm) with closed intermaxillary suture                                    | superimposed CBCT images                         | T1 (baseline)<br>T2 (approx. 1 year postoperative)                                                                             |
| Xi et al. (2017)        | retrospective cohort | SARME (Le Fort I, nasal osteotomies, additional midline osteotomy)                                                                                                                                                                        | yes (only in cases of asymmetric mobility) | TPD (UNI-Smile distractor, Titamed, Kontich, Belgium).                                                               | 1 mm/day (consolidation period of 8 - 10 weeks)                       | 78 with hyrax group  | 30.2                   | 22/56                  | transversal maxillary hypoplasia and mandibular hypoplasia                                                                   | 3D cephalometric reference frame from CBCT       | T1 (baseline)<br>T2 (20.3 ± 6.2 months)                                                                                        |
| Zandi et al. (2014)     | RCT                  | SARME (osteotomy of the lateral maxillary wall from the piriform rim to the pterygomaxillary junction, midline osteotomy between the central incisors, and pterygomaxillary disjunction, not including the releasing of the nasal septum) | yes                                        | TPD (SurgiTec, Bruges, Belgium)                                                                                      | 0.5 - 0.6 mm/day up to an overexpansion of 2 - 3 mm                   | 15                   | 19.4                   | 5/10                   | transverse maxillary deficiency                                                                                              | CBCT                                             | T1 (before operation)<br>T2 (immediately after consolidation period)                                                           |

CBCT: cone beam computed tomography; CT: computed tomography; NA: not available; PA: posteroanterior; RCT: randomized controlled trial

**Table 2.** Outcomes of studies included in the qualitative synthesis.

| Trial ID              | Outcomes                        | N  | Mean <sub>0</sub> | SD <sub>0</sub> | Mean <sub>1</sub> | SD <sub>1</sub> | MD | SD |
|-----------------------|---------------------------------|----|-------------------|-----------------|-------------------|-----------------|----|----|
| Aras et al.<br>(2010) | Maxillary canine area           | 11 |                   |                 |                   |                 |    |    |
|                       | Binasal cavity width (CT - mm)  |    | 24.32             | 2.33            | 29.00             | 2.93            |    |    |
|                       | Bimaxillary width (CT - mm)     |    | 32.82             | 8.45            | 39.41             | 8.91            |    |    |
|                       | Bialveolar width (CT - mm)      |    | 36.36             | 3.67            | 43.73             | 4.31            |    |    |
|                       | Maxillary first molar area      | 11 |                   |                 |                   |                 |    |    |
|                       | Binasal cavity width (CT - mm)  |    | 30.82             | 2.85            | 33.55             | 3.30            |    |    |
|                       | Bimaxillary width (CT - mm)     |    | 52.18             | 7.98            | 56.73             | 6.64            |    |    |
|                       | Bialveolar width (CT - mm)      |    | 48.73             | 8.45            | 54.68             | 8.86            |    |    |
| Aras et al.<br>(2017) | Activation average (mm)         | 16 | 77.11             | 4.42            | 77.74             | 4.66            |    |    |
|                       | Hard tissue variables           |    |                   |                 |                   |                 |    |    |
|                       | SNA* (°)                        |    | 77.11             | 4.42            | 77.74             | 4.66            |    |    |
|                       | SNB* (°)                        |    | 78.57             | 4.36            | 77.93             | 4.06            |    |    |
|                       | ANB* (°)                        |    | -1.46             | 3.02            | -0.19             | 3.36            |    |    |
|                       | ANPg* (°)                       |    | -2.85             | 3.88            | -1.79             | 3.95            |    |    |
|                       | SNGoGn* (°)                     |    | 36.15             | 7.48            | 37.00             | 6.91            |    |    |
|                       | U1-SN (°)                       |    | 103.61            | 6.43            | 102.77            | 6.17            |    |    |
|                       | L1-MP (°)                       |    | 82.91             | 6.25            | 82.77             | 6.23            |    |    |
|                       | Soft tissue variables           |    |                   |                 |                   |                 |    |    |
|                       | Soft tissue facial angle        |    | 90.26             | 8.02            | 89.64             | 7.49            |    |    |
|                       | Nose prominence                 |    | 16.77             | 4.12            | 16.54             | 3.66            |    |    |
|                       | Superior sulcus depth           |    | 2.16              | 1.51            | 2.03              | 1.41            |    |    |
|                       | Soft tissue subnasale to H line |    | 2.41              | 3.08            | 2.70              | 2.84            |    |    |
|                       | Basic upper lip thickness*      |    | 16.57             | 2.50            | 15.96             | 2.34            |    |    |
|                       | Upper lip thickness             |    | 13.30             | 3.07            | 12.75             | 2.27            |    |    |
|                       | H angle                         |    | 7.94              | 5.67            | 8.38              | 5.29            |    |    |
|                       | Lower lip to H line             |    | 1.46              | 1.35            | 1.59              | 1.69            |    |    |
|                       | Inferior sulcus to H line       |    | 3.43              | 2.05            | 3.66              | 1.89            |    |    |
|                       | Soft tissue chin thickness      |    | 12.35             | 1.85            | 12.61             | 1.78            |    |    |
|                       | Upper lip strain measurement    |    | 3.27              | 2.31            | 3.21              | 2.22            |    |    |
|                       | Basic upper lip to Ver P        |    | 76.22             | 7.72            | 76.03             | 6.98            |    |    |
|                       | Upper lip to Ver P              |    | 78.81             | 8.57            | 78.37             | 8.01            |    |    |

|                           |                                                                               |    |        |       |        |             |
|---------------------------|-------------------------------------------------------------------------------|----|--------|-------|--------|-------------|
| Asscherickx et al. (2016) | Activation average (mm)                                                       | 21 |        |       | 6      |             |
|                           | Inter canine width (mm)                                                       |    | 20.4   | 2.71  | 27.0   | 2.77        |
|                           | Inter canine width (mm) (T3)                                                  |    |        |       | 26.1   | 2.99        |
|                           | Inter premolar width (mm)                                                     |    | 23.2   | 2.52  | 29.3   | 2.79        |
|                           | Inter premolar width (mm) (T3)                                                |    |        |       | 28.9   | 3.45        |
|                           | Inter molar width (mm)                                                        |    | 29.5   | 3.88  | 34.9   | 4.01        |
|                           | Inter molar width (mm) (T3)                                                   |    |        |       | 34.9   | 4.01        |
|                           | Arch perimeter (mm)                                                           |    | 67.5   | 6.73  | 34.8   | 3.69        |
|                           | Arch perimeter (mm) (T3)                                                      |    |        |       | 73.0   | 6.56        |
|                           | Premolar inclination (°)                                                      |    | 198.1  | 12.80 | 191.5  | 14.68       |
|                           | Premolar inclination (°) (T3)                                                 |    |        |       | 193.6  | 15.24       |
|                           | Molar inclination (°)                                                         |    | 155.9  | 15.79 | 147.7  | 16.51       |
|                           | Molar inclination (°) (T3)                                                    |    |        |       | 145.3  | 17.26       |
|                           | Medio-orbital width (mm)                                                      |    | 21.6   | 1.61  | 22.4   | 1.45        |
|                           | Medio-orbital width (mm) (T3)                                                 |    |        |       | 22.5   | 1.58        |
|                           | Nasal cavity width (mm)                                                       |    | 30.3   | 2.08  | 33.0   | 2.55        |
|                           | Nasal cavity width (mm) (T3)                                                  |    |        |       | 32.8   | 2.66        |
|                           | Maxillary width (mm)                                                          |    | 55.1   | 3.93  | 59.9   | 4.14        |
|                           | Maxillary width (mm) (T3)                                                     |    |        |       | 59.4   | 3.74        |
| Barone et al. (2020)      | Interdental canine distance (mm)                                              | 12 |        |       |        | 2.18 1.30   |
|                           | Interdental premolar distance (mm)                                            |    |        |       |        | 4.89 3.05   |
|                           | Interdental molar distance (mm)                                               |    |        |       |        | 3.22 3.56   |
|                           | Inter gingival canine distance (mm)                                           |    |        |       |        | 2.21 1.60   |
|                           | Inter gingival premolar distance (mm)                                         |    |        |       |        | 4.35 2.86   |
|                           | Inter gingival premolar distance (mm)                                         |    |        |       |        | 4.35 2.86   |
|                           | Premolar inclination (ΔΔ Interdental – Inter gingival premolar distance) (mm) |    |        |       |        | 0.545 0.466 |
|                           | Molar inclination (ΔΔ Interdental – Inter gingival molar distance) (mm)       |    |        |       |        | 0.555 1.006 |
| Dowgierd et al. (2018)    | S-N-PNS                                                                       | 78 | 39.54  | 4.77  | 40.75  | 3.46        |
|                           | S-PNS-ANS                                                                     |    | 113.53 | 4.95  | 114.05 | 5.21        |
|                           | S-N-ANS                                                                       |    | 7.26   | 5.78  | 7.05   | 4.09        |
|                           | SN-OCL                                                                        |    | 16.67  | 5.91  | 16.35  | 4.58        |
|                           | ANB                                                                           |    | -0.75  | 4.47  | 0.48   | 4.04        |

|                                 |                                                             |       |      |       |      |
|---------------------------------|-------------------------------------------------------------|-------|------|-------|------|
| Haas<br>Junior et<br>al. (2022) | SNA                                                         | 82.52 | 5.69 | 81.28 | 4.19 |
|                                 | SNB                                                         | 82.05 | 5.23 | 81.60 | 5.06 |
|                                 | S-PNS                                                       | 47.42 | 4.69 | 47.87 | 4.48 |
|                                 | N-ANS                                                       | 50.72 | 4.24 | 51.32 | 4.45 |
|                                 | PA-nosefloor                                                | 24.49 | 4.14 | 25.72 | 4.08 |
|                                 | CT_6-6                                                      | 36.94 | 3.47 | 41.77 | 4.26 |
|                                 | CT_6-6_palat_plate                                          | 31.44 | 3.06 | 36.25 | 3.92 |
|                                 | CT_palet_H                                                  | 14.32 | 2.41 | 13.38 | 2.67 |
|                                 | Posterior maxilla distance                                  | 11    |      | 3     | 0.6  |
|                                 | Posterior midpalatal suture distance                        |       |      | 1.8   | 0.3  |
|                                 | Anterior maxilla distance                                   |       |      | 3.7   | 0.6  |
|                                 | Anterior midpalatal suture distance                         |       |      | 2     | 0.4  |
|                                 | Posterior alveolar process distance                         |       |      | 3.2   | 0.6  |
|                                 | Anterior alveolar process distance                          |       |      | 4.4   | 0.7  |
| Hansen et<br>al. (2007)         | Posterior dental crown distance                             |       |      | 4.3   | 0.5  |
|                                 | Posterior dental root distance                              |       |      | 4.7   | 0.5  |
|                                 | Angle UR6                                                   |       |      | 0.9   | 0.6  |
|                                 | Angle UL6                                                   |       |      | 2.3   | 1.4  |
|                                 | Buccal tipping (°)                                          | 12    |      | 4.62  | 3.72 |
|                                 | Premolar right (°)                                          |       |      | 3.09  | 4.44 |
|                                 | Premolar left (°)                                           |       |      | 2.58  | 4.07 |
|                                 | Molar right (°)                                             |       |      | 1.13  | 6.02 |
|                                 | Molar left (°)                                              |       |      | 8.62  | 5.17 |
|                                 | Right alveolar crest<br>premolar region (Ectopremolare) (°) |       |      | 8.22  | 4.85 |
|                                 | Right alveolar crest<br>premolar region (Endopremolare) (°) |       |      | 9.66  | 9.18 |
|                                 | Left alveolar crest<br>premolar region (Ectopremolare) (°)  |       |      | 7.99  | 6.37 |
|                                 | Left alveolar crest<br>premolar region (Endopremolare) (°)  |       |      | 8.01  | 3.04 |
|                                 | Right alveolar crest<br>molar region (Ectomolare) (°)       |       |      | 8.05  | 3.52 |
|                                 | Right alveolar crest<br>molar region (Endomolare) (°)       |       |      | 9.75  | 6.41 |
|                                 | Left alveolar crest<br>molar region (Ectomolare) (°)        |       |      | 8.74  | 8.54 |
|                                 | Left alveolar crest<br>molar region (Endomolare) (°)        |       |      | 3.00  | 1.49 |

|                               |                                                                 |    |      |     |      |       |             |
|-------------------------------|-----------------------------------------------------------------|----|------|-----|------|-------|-------------|
| Huizinga<br>et al.<br>(2018)  | Midpalatal suture expansion - anterior nasal spine (mm)         |    |      |     |      | 0.97  | 0.92        |
|                               | Midpalatal suture expansion - posterior nasal spine (mm)        |    |      |     |      | 4.24  | 3.53        |
|                               | Transverse expansion at A-point                                 |    |      |     |      | 4.62  | 3.72        |
|                               | Alveolar process expansion - premolars (mm)                     |    |      |     |      | 5.55  | 2.63        |
|                               | Alveolar process expansion - molars (mm)                        |    |      |     |      | 4.87  | 2.44        |
|                               | Crown expansion - premolars (mm)                                |    |      |     |      | 6.07  | 2.97        |
|                               | Crown expansion - molars (mm)                                   |    |      |     |      | 5.71  | 2.42        |
|                               | Root-apex expansion - premolars (mm)                            |    |      |     |      | 4.28  | 2.99        |
|                               | Root-apex expansion - molars (mm)                               |    |      |     |      | 4.98  | 2.28        |
|                               | <i>Lateral expansion in five directions</i>                     |    |      |     |      | MEDIA | IQR         |
|                               |                                                                 |    |      |     |      | N     |             |
|                               | Inferior-anterior of the right maxillary segment (mm)           |    |      |     |      | 0.36  | -1.42, 3.29 |
|                               | Inferior-posterior of the right maxillary segment (mm)          |    |      |     |      | -0.03 | -0.54, 1.74 |
|                               | Superior-posterior of the right maxillary segment (mm)          |    |      |     |      | 0.10  | -0.45, 1.46 |
|                               | Anterior vs. posterior of the anterior part of the maxilla (mm) |    |      |     |      | -0.53 | -1.40, 1.13 |
|                               | Caudal vs. cranial of the caudal part of the maxilla (mm)       |    |      |     |      | 1.51  | 0.69, 1.93  |
| Koudstaal<br>et al.<br>(2009) | Width - Canine (mm) (T1-T2)                                     | 23 | 28.9 | 4.2 | 34.9 | 5.7   |             |
|                               | Width - Canine (mm) (T3)                                        |    |      |     | 33.6 | 3.6   |             |
|                               | Width - Premolar (mm) (T1-T2)                                   |    | 35.2 | 3.4 | 42.2 | 3.8   |             |
|                               | Width - Premolar (mm) (T3)                                      |    |      |     | 42.3 | 3     |             |
|                               | Width - Molar (mm) (T1-T2)                                      |    | 47.1 | 3.5 | 52.3 | 3.7   |             |
|                               | Width - Molar (mm) (T3)                                         |    |      |     | 51.7 | 3.6   |             |
|                               | Arch perimeter (mm) (T1-T2)                                     |    | 64.2 | 8.9 | 71.5 | 8.8   |             |
|                               | Arch perimeter (mm) (T3)                                        |    |      |     | 70   | 7.2   |             |
|                               | Palatal depth premolar (mm) (T1-T3)                             |    | 20.3 | 4.6 | 20.2 | 4     |             |
|                               | Palatal depth molar (mm) (T1-T3)                                |    | 22.7 | 2.6 | 22.3 | 2.5   |             |
|                               | Palatal width premolar (mm) (T1-T3)                             |    | 12.2 | 4   | 15.1 | 3.5   |             |
|                               | Palatal width molar (mm) (T1-T3)                                |    | 16.6 | 4.7 | 19.2 | 4.3   |             |
|                               | SNA (°) (T1-T3)                                                 |    | 79.7 | 4   | 80.2 | 4.3   |             |
|                               | Distance SN to A (mm) (T1-T3)                                   |    | 61.7 | 5.2 | 62.4 | 5     |             |
|                               | Distance SN to PNS (mm) (T1-T3)                                 |    | 48   | 4.8 | 48.8 | 4.7   |             |
|                               | Nasal floor (mm) (T1/T2)                                        |    | 17.8 | 3   | 20.4 | 2.3   |             |
|                               | Nasal floor (mm) (T3)                                           |    |      |     | 19.2 | 2.7   |             |
|                               | Maxilla floor (mm) (T1/T2)                                      |    | 58.8 | 4   | 62.1 | 3.8   |             |

|                       |                                                            |      |       |      |
|-----------------------|------------------------------------------------------------|------|-------|------|
| Kunz et al. (2016)    | Maxilla floor (mm) (T3)                                    | 61.4 | 3.8   |      |
|                       | Maxillary tipping (mm) (T1/T2)                             |      | 0.7   | 2.6  |
|                       | Maxillary tipping (mm) (T1/T3)                             |      | 1.2   | 2.1  |
|                       | Transverse distance canines (mm)                           | 16   | 4.43  | 2.21 |
|                       | Transverse distance first premolars (mm)                   |      | 4.56  | 2.27 |
|                       | Transverse distance second premolars (mm)                  |      | 4.18  | 1.77 |
|                       | Transverse distance first molars (mm)                      |      | 3.53  | 1.83 |
|                       | Transverse distance second molars (mm)                     |      | 2.72  | 1.19 |
|                       | Tooth inclination right canine (°)                         |      | -0.57 | 5.20 |
|                       | Tooth inclination left canine (°)                          |      | -1.12 | 4.89 |
|                       | Tooth inclination right first premolar (°)                 |      | -1.17 | 6.00 |
|                       | Tooth inclination left first premolar (°)                  |      | 0.17  | 3.52 |
|                       | Tooth inclination right second premolar (°)                |      | -1.33 | 3.76 |
|                       | Tooth inclination left second premolar (°)                 |      | -1.08 | 4.15 |
|                       | Tooth inclination right first molar (°)                    |      | -1.47 | 4.25 |
|                       | Tooth inclination left first molar (°)                     |      | -0.73 | 4.07 |
|                       | Tooth inclination right second molar (°)                   |      | -2.22 | 3.62 |
|                       | Tooth inclination left second molar (°)                    |      | -0.08 | 3.02 |
| Landes et al. (2009a) | Skeletal widening: HP.PA.4.7 - Bipartite (mm)              | 8    | -2.73 | 2.24 |
|                       | Skeletal widening: HP.PA.4.7 - Tripartite (mm)             | 11   | -4.4  | 3.59 |
|                       | Skeletal widening: BAC.LAC.4.7 - Bipartite (mm)            | 8    | -3.01 | 2.14 |
|                       | Skeletal widening: BAC.LAC.4.7 - Tripartite (mm)           | 11   | -3.98 | 2.39 |
|                       | Segmental Inclination: HP.PA.BAC.LAC.4.7 - Bipartite (mm)  | 8    | -0.60 | 2.95 |
|                       | Segmental Inclination: HP.PA.BAC.LAC.4.7 - Tripartite (mm) | 11   | 4.44  | 2.38 |
|                       | Dental widening: DAE.DAI.4.7 - Bipartite (mm)              | 8    | -3.76 | 2.18 |
|                       | Dental widening: DAE.DAI.4.7 - Tripartite (mm)             | 11   | -4.5  | 4.42 |
|                       | Dental widening: DAE'.DAI'.4.7 - Bipartite (mm)            | 8    | -4.05 | 2.99 |
|                       | Dental widening: DAE'.DAI'.4.7 - Tripartite (mm)           | 11   | -5.08 | 5.29 |
|                       | Dental tipping: HP.PA.DAE.DAI.4.7 - Biapartite (mm)        | 8    | -1.18 | 3.03 |
|                       | Dental tipping: HP.PA.DAE.DAI.4.7 - Tripartite (mm)        | 11   | -0.37 | 5.97 |
|                       | Bone resorption: premolar - Biapartite (mm)                | 8    | -0.41 | 0.77 |
|                       | Bone resorption: premolar - Triapartite (mm)               | 11   | -0.13 | 0.93 |
|                       | Bone resorption: molar - Biapartite (mm)                   | 8    | -0.38 | 0.4  |
|                       | Bone resorption: molar - Triapartite (mm)                  | 11   | -0.31 | 0.27 |



Landes et  
al.  
(2009b)

*Transverse Skeletal Widening of the Maxilla*

|                                                  |    |       |      |
|--------------------------------------------------|----|-------|------|
| HP.PA4 (mm)                                      | 21 | 6.51  | 3.19 |
| BAC.LAC4 (mm)                                    | 22 | 7.16  | 2.91 |
| HP.PA5 (mm)                                      | 21 | 3.38  | 1.75 |
| BAC.LAC5 (mm)                                    | 24 | 6.39  | 2.87 |
| HP.PA6 (mm)                                      | 19 | 3.19  | 1.87 |
| BAC.LAC6 (mm)                                    | 23 | 5.07  | 1.63 |
| HP.PA7 (mm)                                      | 21 | 2.6   | 1.7  |
| BAC.LAC7 (mm)                                    | 23 | 3.42  | 2.31 |
| HP.PA.4.7 (mm)                                   | 19 | -3.7  | 3.13 |
| BAC.LAC.4.7 (mm)                                 | 21 | -3.51 | 2.28 |
| <i>Transverse Dental Widening of the Maxilla</i> |    |       |      |
| DA.E'.DA.I'4 (mm)                                | 13 | 7.30  | 2.49 |
| DA.E.DA.I4 (mm)                                  | 14 | 7.51  | 3.3  |
| DA.E'.DA.I'5 (mm)                                | 14 | 6.68  | 3.21 |
| DA.E.DA.I5 (mm)                                  | 10 | 6.89  | 3.44 |
| DA.E'.DA.I'6 (mm)                                | 13 | 6.84  | 1.97 |
| DA.E.DA.I6 (mm)                                  | 12 | 7.12  | 2.29 |
| DA.E'.DA.I'7 (mm)                                | 12 | 3.24  | 1.63 |
| DA.E.DA.I7 (mm)                                  | 12 | 3.42  | 2.31 |
| DA.E'.DA.I'4.7 (mm)                              | 11 | -4.16 | 3.44 |
| DA.E.DA.I.4.7 (mm)                               | 10 | -4.67 | 2.28 |
| DA.E'.DA.I'4 (mm)                                | 13 | 7.30  | 2.49 |
| <i>Segmental Inclination and Dental Tipping</i>  |    |       |      |
| HP.PA.BAC.LAC.4                                  | 21 | 0.65  | 1.37 |
| HP.PA.BAC.LAC.5                                  | 21 | 2.85  | 2.29 |
| HP.PA.BAC.LAC.6                                  | 19 | 1.92  | 1.39 |
| HP.PA.BAC.LAC.7                                  | 21 | 0.41  | 1.58 |
| HP.PA.BAC.LAC.4.7                                | 19 | -0.11 | 2.33 |
| HP.PA.DA.E.DA.I.4                                | 14 | 0.78  | 2.43 |
| HP.PA.DA.E.DA.I.5                                | 10 | 3.94  | 2.14 |
| HP.PA.DA.E.DA.I.6                                | 12 | 4.02  | 2.22 |
| HP.PA.DA.E.DA.I.7                                | 12 | 0.68  | 3.0  |
| HP.PA.DA.E.DA.I.4.7                              | 10 | -0.69 | 4.81 |

|                         |                                                            |    |       |      |
|-------------------------|------------------------------------------------------------|----|-------|------|
| Laudemann et al. (2009) | HP.PA.BAC.LAC.4                                            |    |       |      |
|                         | Vestibular Bone Resorption                                 | 22 | -0.85 | 2.57 |
|                         | TA.BAC 4(mm)                                               | 22 | -0.02 | 0.13 |
|                         | BTA.E 4(mm)                                                | 22 | 0.21  | 1.99 |
|                         | LTA.HP 4(mm)                                               | 24 | -0.88 | 2.15 |
|                         | TA.BAC 5(mm)                                               | 24 | -0.19 | 1.03 |
|                         | BTA.E 5(mm)                                                | 24 | 0.08  | 0.72 |
|                         | LTA.HP 5(mm)                                               | 24 | 0     | 0.3  |
|                         | TA.BAC 6(mm)                                               | 24 | -0.59 | 0.59 |
|                         | BTA.E 6(mm)                                                | 24 | -0.05 | 0.6  |
|                         | LTA.HP 6(mm)                                               | 24 | -0.89 | 1.53 |
|                         | TA.BAC 7(mm)                                               | 24 | -0.39 | 0.9  |
|                         | BTA.E 7(mm)                                                | 24 | -0.18 | 0.51 |
|                         | BLP.BMP (transverse widening at pterygoid level)           | 24 | -3.3  | 3.7  |
|                         | Angle I-I (°) (lateral bending of the pterygoid processes) | 24 | 7.0   | 18.8 |
|                         | Transverse widening HP.PA.4.7 (mm) (with PMD)              | 11 | -4.50 | 3.91 |
|                         | Transverse widening HP.PA.4.7 (mm)                         | 13 | -2.61 | 2.43 |
|                         | Transverse widening BAC.LAC.4.7 (mm) (with PMD)            | 11 | -3.00 | 2.44 |
|                         | Transverse widening BAC.LAC.4.7 (mm)                       | 13 | -3.52 | 2.69 |
|                         | Segmental inclination HP.PA.BAC.LAC.4.7 (mm) (with PMD)    | 11 | 1.50  | 2.86 |
|                         | Segmental inclination HP.PA.BAC.LAC.4.7 (mm)               | 13 | -0.91 | 1.89 |
|                         | Transverse widening (dental arch to pterygoid level)       | 11 | -1.77 | 4.14 |
|                         | BLP.BMP. HP.PA.BAC.LAC6.7 (mm) (with PMD)                  |    |       |      |
|                         | Transverse widening (dental arch to pterygoid level)       | 13 | 0.57  | 2.97 |
|                         | BLP.BMP. HP.PA.BAC.LAC6.7 (mm)                             |    |       |      |
|                         | Bone resorption premolars (mm) (with PMD)                  | 11 | 0.29  | 0.53 |
|                         | Bone resorption premolars (mm)                             | 13 | -0.74 | 0.77 |
|                         | Bone resorption molars (mm) (with PMD)                     | 11 | -0.36 | 0.36 |
|                         | Bone resorption molars (mm)                                | 13 | -0.34 | 0.33 |
| Laudemann et al. (2010) | Transverse Skeletal Widening GM.3.7 (mm) (gingival margin) | 7  | 1.61  | 1.76 |
|                         | Transverse Skeletal Widening CT.3.7 (mm) (cusp tips)       | 13 | 0.99  | 3.28 |
|                         | Inter canine GM.CT (mm) (dental tipping)                   | 12 | -0.21 | 0.95 |
|                         | 1st premolar GM.CT (mm)                                    | 10 | -0.06 | 1.27 |
|                         | 2nd premolar GM.CT (mm)                                    | 10 | 0.54  | 1.15 |

|                         |                                                           |    |       |      |
|-------------------------|-----------------------------------------------------------|----|-------|------|
| Laudemann et al. (2011) | 1st molar GM.CT (mm)                                      | 9  | 0.22  | 1.01 |
|                         | 2nd molar GM.CT (mm)                                      | 8  | 0.97  | 0.64 |
|                         | Ccl 1 (Clinical crown length - attachment loss)           | 17 | 0.4   | 1.14 |
|                         | Ccl 2                                                     | 12 | 0.78  | 0.85 |
|                         | Ccl 3                                                     | 14 | 0.51  | 0.75 |
|                         | Ccl 4                                                     | 10 | 0.44  | 0.83 |
|                         | Ccl 5                                                     | 10 | 0.40  | 0.65 |
|                         | Ccl 6                                                     | 9  | -0.12 | 0.55 |
|                         | Ccl 7                                                     | 8  | 0.23  | 0.62 |
|                         | 25 Overall in BB group                                    |    |       |      |
|                         | Transverse Widening (HP.PA.4.7)(<20 years old) (with PMD) |    | -4.72 | 5.34 |
|                         | Transverse Widening (HP.PA.4.7) (>20) (with PMD)          |    | -4.03 | 1.73 |
|                         | Transverse Widening (HP.PA.4.7)(<20)                      |    | -2.77 | 2.09 |
|                         | Transverse Widening (HP.PA.4.7)(>20)                      |    | -3.01 | 2.83 |
|                         | Transverse Widening (BAC.LAC.4.7) (<20) (with PMD)        |    | -2.50 | 3.07 |
|                         | Transverse Widening (BAC.LAC.4.7)(>20) (with PMD)         |    | -3.18 | 2.16 |
|                         | Transverse Widening (BAC.LAC.4.7)(<20)                    |    | -3.58 | 2.32 |
|                         | Transverse Widening (BAC.LAC.4.7)(>20)                    |    | -4.48 | 1.33 |
|                         | Segmental Inclination (HP.PA.BAC.LAC.4.7)(<20) (with PMD) |    | 1.81  | 2.78 |
|                         | Segmental Inclination (HP.PA.BAC.LAC.4.7)(>20) (with PMD) |    | 0.34  | 1.62 |
|                         | Segmental Inclination (HP.PA.BAC.LAC.4.7)(<20)            |    | -0.81 | 2.18 |
|                         | Segmental Inclination (HP.PA.BAC.LAC.4.7)(>20)            |    | -1.47 | 2.08 |
|                         | Bone Resorption: Premolars (<20) (with PMD)               |    | 0.42  | 0.41 |
|                         | Bone Resorption: Premolars (>20) (with PMD)               |    | 0.08  | 0.24 |
|                         | Bone Resorption: Premolars (<20)                          |    | -0.49 | 0.41 |
|                         | Bone Resorption: Premolars (>20)                          |    | -0.5  | 0.67 |
|                         | Bone Resorption: Molars (<20) (with PMD)                  |    | -0.46 | 0.50 |
|                         | Bone Resorption: Molars (>20) (with PMD)                  |    | -0.42 | 0.56 |
|                         | Bone Resorption: Molars(<20)                              |    | -0.45 | 0.49 |
|                         | Bone Resorption: Molars(>20)                              |    | -0.47 | 0.15 |
|                         | Dental Tipping (HP.PA.DA.E.DA.I.4.7)(<20) (with PMD)      |    | 1.13  | 2.28 |
|                         | Dental Tipping (HP.PA.DA.E.DA.I.4.7)(>20) (with PMD)      |    | 0.90  | 0.22 |
|                         | Dental Tipping (HP.PA.DA.E.DA.I.4.7)(<20)                 |    | -1.73 | 2.05 |

|                              |                                                                            |        |       |
|------------------------------|----------------------------------------------------------------------------|--------|-------|
| Matteini<br>et al.<br>(2001) | Dental Tipping (HP.PA.DA.E.DA.I.4.7)(>20)                                  | 0.53   | 2.10  |
|                              | Pterygoid Widening (BLP.BMP)(<20) (with PMD)                               | -2.91  | 4.72  |
|                              | Pterygoid Widening (BLP.BMP)(>20) (with PMD)                               | 0.81   | 3.33  |
|                              | Pterygoid Widening (BLP.BMP)(<20)                                          | 0.31   | 2.64  |
|                              | Pterygoid Widening (BLP.BMP)(>20)                                          | -0.16  | 5.95  |
|                              | Pterygoid Bending (Angle 1-1)(<20) (with PMD)                              | 5.08   | 23.06 |
|                              | Pterygoid Bending (Angle 1-1)(>20) (with PMD)                              | 4.83   | 8.09  |
|                              | Pterygoid Bending (Angle 1-1)(<20)                                         | 7.17   | 27.65 |
|                              | Pterygoid Bending (Angle 1-1)(>20)                                         | -2.13  | 20.00 |
|                              | Pterygomaxillary                                                           | -3.04  | 2.88  |
|                              | Inclination(BLP.BMP.HP.PA.BAC.LAC.6.7)(<20) (with PMD)                     |        |       |
|                              | Pterygomaxillary                                                           | -2.42  | 0.97  |
|                              | Inclination(BLP.BMP.HP.PA.BAC.LAC.6.7)(>20) (with PMD)                     |        |       |
|                              | Pterygomaxillary                                                           | -0.74  | 3.36  |
|                              | Inclination(BLP.BMP.HP.PA.BAC.LAC.6.7)(<20)                                |        |       |
|                              | Pterygomaxillary                                                           | 0.99   | 4.80  |
|                              | Inclination(BLP.BMP.HP.PA.BAC.LAC.6.7)(>20)                                |        |       |
|                              | Transverse Widening (BAC.LAC.4.7)(2-segment osteotomy)<br>(with PMD)       | -3.01  | 2.80  |
|                              | Transverse Widening (BAC.LAC.4.7)(3-segment osteotomy)<br>(with PMD)       | -2.69  | 2.68  |
|                              | Transverse Widening (BAC.LAC.4.7)(2S)                                      | -2.99  | 1.87  |
|                              | Transverse Widening (BAC.LAC.4.7)(3S)                                      | -5.13  | 5.95  |
|                              | Pterygoid Bending (Angle 1-1)(2S) (with PMD)                               | 11.50  | 17.68 |
|                              | Pterygoid Bending (Angle 1-1)(3S) (with PMD)                               | 0.29   | 15.11 |
|                              | Pterygoid Bending (Angle 1-1)(2S)                                          | 18.79  | 24.93 |
|                              | Pterygoid Bending (Angle 1-1)(3S)                                          | -12.58 | 11.38 |
|                              | Pterygomaxillary Inclination<br>(BLP.BMP.HP.PA.BAC.LAC.6.7)(2S) (with PMD) | -2.23  | 1.33  |
|                              | Pterygomaxillary Inclination<br>(BLP.BMP.HP.PA.BAC.LAC.6.7)(3S) (with PMD) | -2.99  | 2.58  |
|                              | Pterygomaxillary Inclination<br>(BLP.BMP.HP.PA.BAC.LAC.6.7)(2S)            | 0.56   | 4.13  |
|                              | Pterygomaxillary Inclination<br>(BLP.BMP.HP.PA.BAC.LAC.6.7)(3S)            | -1.27  | 3.07  |
|                              | expansion canines (%)                                                      | 20     | 29.9  |
|                              | expansion 1st premolars (%)                                                |        | 28.3  |
|                              | expansion 1st molars (%)                                                   |        | 20.8  |
|                              | expansion ratio canine level (%)                                           |        | 22.4  |
|                              | expansion ration 1st premolar level (%)                                    |        | 21.9  |
|                              | expansion ratio 1st molar level (%)                                        |        | 20.8  |

|                        |                                                                 |    |        |      |        |      |
|------------------------|-----------------------------------------------------------------|----|--------|------|--------|------|
| Nada et al. (2012)     | <i>Interocclusal</i>                                            |    |        |      |        |      |
|                        | Width at canines (mm)                                           | 17 | 30.29  | 3.1  | 36.05  | 2.3  |
|                        | Width at first premolars (mm)                                   |    | 36.77  | 2.4  | 43.02  | 1.7  |
|                        | Width at second premolars(mm)                                   |    | 40.79  | 2.3  | 47.37  | 3.1  |
|                        | Width at first molars (mm)                                      |    | 45.01  | 4.3  | 52.15  | 3.4  |
|                        | Width at second molars (mm)                                     |    | 52.12  | 4.1  | 56.71  | 3    |
|                        | <i>Interapical</i>                                              |    |        |      |        |      |
|                        | Width first premolars Ap-Ap' (mm)                               |    | 31.32  | 4.2  | 36.56  | 4.2  |
|                        | Width first molars Ap-Ap' (mm)                                  |    | 31.77  | 3.54 | 36.37  | 2.9  |
|                        | <i>Intercoronal</i>                                             |    |        |      |        |      |
|                        | Width at first premolars Cb-Cb' (mm)                            |    | 36.58  | 3.1  | 43.54  | 1.8  |
|                        | Width at first molars Cb-Cb' (mm)                               |    | 46.83  | 4    | 53.6   | 3.17 |
|                        | Alveolar expansion Right segment (mm)                           |    |        |      | 1.91   | 0.97 |
|                        | Alveolar expansion Left segment (mm)                            |    |        |      | 1.69   | 0.68 |
|                        | Alveolar expansion Anterior segment (mm)                        |    |        |      | -1.35  | 1.53 |
| Nada et al. (2013)     | <i>Soft tissues</i>                                             |    |        |      |        |      |
|                        | L-mid (mm) (region of upper lip)                                | 15 |        |      | -1.6   | 1.9  |
|                        | L-right (mm)                                                    |    |        |      | -0.45  | 2.3  |
|                        | L-left (mm)                                                     |    |        |      | -0.48  | 1.8  |
|                        | C-right (mm) (cheek region posterior to the angle of the mouth) |    |        |      | 1.48   | 1.6  |
|                        | C-left (mm)                                                     |    |        |      | 0.82   | 1.6  |
|                        | <i>Hard tissues</i>                                             |    |        |      |        |      |
|                        | B-mid (mm) (anterior maxillary segment)                         |    |        |      | -1.12  | 1.5  |
|                        | B-right (mm) (posterior maxillary segment)                      |    |        |      | 1.97   | 0.9  |
|                        | B-left (mm) (posterior maxillary segment)                       |    |        |      | 1.82   | 0.9  |
|                        | U1/pp (°)                                                       |    | 112.01 | 7.1  | 102.72 | 7.6  |
| Nikolaev et al. (2017) | Interapical distance canines (mm)                               | 21 |        |      | 2.6    | 0.3  |
|                        | Interapical distance 1st premolars (mm)                         |    |        |      | 3.1    | 0.4  |
|                        | Interapical distance 2nd premolars                              |    |        |      | 2.3    | 0.3  |
|                        | Interapical distance molars (mm)                                |    |        |      | 2.3    | 0.3  |
|                        | Intercoronal distance canines (mm)                              |    |        |      | 3.9    | 0.4  |
|                        | Intercoronal distance 1st premolars (mm)                        |    |        |      | 4.8    | 0.5  |

|                       |                                                  |    |      |      |      |       |      |
|-----------------------|--------------------------------------------------|----|------|------|------|-------|------|
| Parhiz et al. (2011)  | Intercoronal distance 2nd premolars(mm)          |    |      |      |      | 4.7   | 0.5  |
|                       | Intercoronal distance molars(mm)                 |    |      |      |      | 4.1   | 0.4  |
|                       | U1-SN                                            | 50 |      |      |      | -4.82 | 8.94 |
|                       | U1-PP                                            |    |      |      |      | -3.86 | 8.56 |
|                       | PP-SN                                            |    |      |      |      | 0.94  | 2.13 |
|                       | PP-Mand.                                         |    |      |      |      | -0.22 | 3.38 |
|                       | SNA                                              |    |      |      |      | 1.60  | 2.57 |
|                       | SNB                                              |    |      |      |      | 0.46  | 2.61 |
|                       | ANB                                              |    |      |      |      | 1.06  | 2.00 |
|                       | SN-Mand.                                         |    |      |      |      | 0.66  | 3.03 |
| Petrick et al. (2011) | Midpalatal suture density - anterior (HU)        | 16 | 950  | 167  | 16   | 459   |      |
|                       | Midpalatal suture density - median (HU)          |    | 845  | 125  | 16   | 452   |      |
|                       | Midpalatal suture density - posterior (HU)       |    | 1046 | 103  | 16   | 787   |      |
|                       | Midpalatal suture width - anterior (mm)          |    | 3.41 | 1.74 | 5.71 | 2.57  |      |
|                       | Midpalatal suture width - median (mm)            |    | 2.79 | 1.55 | 3.90 | 2.08  |      |
|                       | Midpalatal suture width - posterior (mm)         |    | 2.32 | 1.06 | 2.57 | 1.13  |      |
| Pinto et al. (2001)   | Expansion canines (%)                            | 20 |      |      |      | 35.7  | 17   |
|                       | Expansion first premolars (%)                    |    |      |      |      | 31.7  | 14   |
|                       | Expansion first molars (%)                       |    |      |      |      | 20.4  | 8.7  |
|                       | Arch periphery gain after expansion              |    |      |      |      | 10.5  | 4.6  |
|                       | Angulation of first premolars (°)                |    |      |      |      | -8.3  | 9.6  |
|                       | Angulation of first molars (°)                   |    |      |      |      | 0.9   | 9.9  |
| Ploder et al. (2021)  | Tooth level - TPD                                | 12 |      |      |      |       |      |
|                       | Overall expansion tooth level (T1-T2) (mm)       |    |      |      |      | 5.22  | 1.72 |
|                       | Overall expansion tooth level (T2-T3) (mm)       |    |      |      |      | 0.76  | 1.37 |
|                       | Expansion canines tooth level (T1-T2) (mm)       |    |      |      |      | 4.76  | 3.00 |
|                       | Expansion canines tooth level (T2-T3) (mm)       |    |      |      |      | 1.33  | 1.25 |
|                       | Expansion 1st premolars tooth level (T1-T2) (mm) |    |      |      |      | 4.82  | 1.22 |
|                       | Expansion 1st premolars tooth level (T2-T3) (mm) |    |      |      |      | 0.94  | 1.67 |
|                       | Expansion 2nd premolars tooth level (T1-T2) (mm) |    |      |      |      | 6.82  | 1.86 |
|                       | Expansion 2nd premolars tooth level (T2-T3) (mm) |    |      |      |      | 0.13  | 2.51 |
|                       | Expansion 1st molars tooth level (T1-T2) (mm)    |    |      |      |      | 4.91  | 2.64 |
|                       | Expansion 1st molars tooth level (T2-T3) (mm)    |    |      |      |      | 0.06  | 1.63 |

|                                                  |      |      |
|--------------------------------------------------|------|------|
| Expansion 2nd molars tooth level (T1-T2) (mm)    | 4.47 | 2.71 |
| Expansion 2nd molars tooth level (T2-T3) (mm)    | 0.85 | 1.42 |
| <i>Tooth level - OMI</i>                         | 13   |      |
| Overall expansion tooth level (T1-T2) (mm)       | 4.66 | 2.03 |
| Overall expansion tooth level (T2-T3) (mm)       | 0.71 | 0.96 |
| Expansion canines tooth level (T1-T2) (mm)       | 4.38 | 1.57 |
| Expansion canines tooth level (T2-T3) (mm)       | 0.85 | 1.59 |
| Expansion 1st premolars tooth level (T1-T2) (mm) | 4.91 | 2.29 |
| Expansion 1st premolars tooth level (T2-T3) (mm) | 0.86 | 0.83 |
| Expansion 2nd premolars tooth level (T1-T2) (mm) | 5.19 | 2.57 |
| Expansion 2nd premolars tooth level (T2-T3) (mm) | 0.97 | 1.61 |
| Expansion 1st molars tooth level (T1-T2) (mm)    | 4.89 | 3.08 |
| Expansion 1st molars tooth level (T2-T3) (mm)    | 0.5  | 1.55 |
| Expansion 2nd molars tooth level (T1-T2) (mm)    | 3.69 | 2.34 |
| Expansion 2nd molars tooth level (T2-T3) (mm)    | 0.36 | 1.47 |
| <i>Bone level - TPD</i>                          | 12   |      |
| Overall expansion bone level (T1-T2) (mm)        | 4.66 | 2.03 |
| Overall expansion bone level (T2-T3) (mm)        | 0.71 | 0.96 |
| Expansion canines bone level (T1-T2) (mm)        | 4.38 | 1.57 |
| Expansion canines bone level (T2-T3) (mm)        | 0.85 | 1.59 |
| Expansion 1st premolars bone level (T1-T2) (mm)  | 4.91 | 2.29 |
| Expansion 1st premolars bone level (T2-T3) (mm)  | 0.86 | 0.83 |
| Expansion 2nd premolars bone level (T1-T2) (mm)  | 5.19 | 2.57 |
| Expansion 2nd premolars bone level (T2-T3) (mm)  | 0.97 | 1.61 |
| Expansion 1st molars bone level (T1-T2) (mm)     | 4.89 | 3.08 |
| Expansion 1st molars bone level (T2-T3) (mm)     | 0.5  | 1.55 |
| Expansion 2nd molars bone level (T1-T2) (mm)     | 3.69 | 2.34 |
| Expansion 2nd molars bone level (T2-T3) (mm)     | 0.36 | 1.47 |
| <i>Bone level - OMI</i>                          | 13   |      |
| Overall expansion bone level (T1-T2) (mm)        | 3.51 | 1.66 |
| Overall expansion bone level (T2-T3) (mm)        | 0.12 | 1.56 |
| Expansion canines bone level (T1-T2) (mm)        | 3.99 | 1.99 |
| Expansion canines bone level (T2-T3) (mm)        | 0.00 | 1.86 |
| Expansion 1st premolars bone level (T1-T2) (mm)  | 4.37 | 2.17 |
| Expansion 1st premolars bone level (T2-T3) (mm)  | 0.09 | 1.49 |

|                               |                                                   |       |      |
|-------------------------------|---------------------------------------------------|-------|------|
| Seeberger<br>et al.<br>(2015) | Expansion 2nd premolars bone level (T1-T2) (mm)   | 3.35  | 1.50 |
|                               | Expansion 2nd premolars bone level (T2-T3) (mm)   | -0.06 | 1.98 |
|                               | Expansion 1st molars bone level (T1-T2) (mm)      | 3.20  | 1.64 |
|                               | Expansion 1st molars bone level (T2-T3) (mm)      | 0.28  | 1.48 |
|                               | Expansion 2nd molars bone level (T1-T2) (mm)      | 2.46  | 1.69 |
|                               | Expansion 2nd molars bone level (T2-T3) (mm)      | 0.04  | 1.83 |
|                               | 19                                                | MEDIA | IQR  |
|                               |                                                   | N     |      |
|                               | Expansion of maxilla (mm)                         | 5.0   |      |
|                               | Nasal isthmus 1 (mm) (anterior to posterior)      | 3.0   | 3.2  |
|                               | Nasal floor 2 (mm)                                | 1.5   | 3.4  |
|                               | Nasal floor 3 (mm)                                | 1.1   | 1.8  |
|                               | Nasal floor 4 (mm)                                | 0.9   | 3.1  |
|                               | Premolar crown width (mm)                         | 4.6   | 3.4  |
|                               | Premolar apex width (mm)                          | 3.3   | 3.1  |
|                               | Premolar angle right (°)                          | -1.49 | 6.96 |
|                               | Premolar angle left (°)                           | -2.61 | 3.01 |
|                               | Molar crown width (mm)                            | 3.40  | 2.4  |
|                               | Molar apex width (mm)                             | 3.20  | 2.8  |
|                               | Molar angle right (°)                             | -3.44 | 6.78 |
|                               | Molar angle left (°)                              | -1.13 | 5.72 |
| Tausche<br>et al.<br>(2007)   | <i>Transverse expansion - Teeth</i>               | 10    |      |
|                               | Maxillary central incisors (diastema) (mm)        | 4.57  | 2.13 |
|                               | Maxillary canines (mm)                            | 5.59  | 2.75 |
|                               | Maxillary first premolars (mm)                    | 6.72  | 2.58 |
|                               | Maxillary first molars (mm)                       | 6.44  | 1.92 |
|                               | Apices of maxillary central incisors (mm)         | 3.25  | 2.89 |
|                               | Apices of maxillary canines (mm)                  | 5.72  | 3.39 |
|                               | Buccal apices of first premolars (mm)             | 5.79  | 2.65 |
|                               | Mesiobuccal apices of maxillary first molars (mm) | 6.53  | 2.07 |
|                               | <i>Transverse expansion – Alveolar crest</i>      |       |      |
|                               | Ectoprämolare (mm)                                | 7.27  | 2.75 |
|                               | Endoprämolare (mm)                                | 7.76  | 3.18 |



|                             |                                              |    |      |     |      |       |      |
|-----------------------------|----------------------------------------------|----|------|-----|------|-------|------|
| Wallner<br>et al.<br>(2022) | Ectomolare (mm)                              |    |      |     |      | 7.15  | 2.3  |
|                             | Endomolare (mm)                              |    |      |     |      | 7.18  | 1.88 |
|                             | <i>Transverse expansion – Alveolar crest</i> |    |      |     |      |       |      |
|                             | Lower margins of orbitae (mm)                |    |      |     |      | 0.012 | 0.01 |
|                             | Piriform (mm)                                |    |      |     |      | 1.59  | 0.58 |
|                             | Anterior nasal spine (mm)                    |    |      |     |      | 3.91  | 2.49 |
|                             | Posterior nasal spine (mm)                   |    |      |     |      | 1.42  | 2.03 |
|                             | Zygomaxillare (mm)                           |    |      |     |      | 0.11  | 0.1  |
|                             | Point A (mm)                                 |    |      |     |      | 4.18  | 3.03 |
|                             | Point B (mm)                                 |    |      |     |      | -0.17 | 0.2  |
|                             | <i>Buccal tipping – Teeth</i>                |    |      |     |      |       |      |
|                             | Maxillary first premolar, right (°)          |    |      |     |      | 3.0   |      |
|                             | Maxillary first premolar, left (°)           |    |      |     |      | 3.9   |      |
|                             | Maxillary first molar, right (°)             |    |      |     |      | 3.5   |      |
|                             | Maxillary first molar, left (°)              |    |      |     |      | 2.5   |      |
|                             | <i>Buccal tipping – Alveolar crest</i>       |    |      |     |      |       |      |
|                             | Premolar region, right Ectoprämolare (°)     |    |      |     |      | 11.1  |      |
|                             | Premolar region, right Endoprämolare (°)     |    |      |     |      | 13.3  |      |
|                             | Premolar region, right average (°)           |    |      |     |      | 12.2  |      |
|                             | Premolar region, left Ectoprämolare (°)      |    |      |     |      | 10.8  |      |
|                             | Premolar region, left Endoprämolare (°)      |    |      |     |      | 9.9   |      |
|                             | Premolar region, left average (°)            |    |      |     |      | 10.4  |      |
|                             | Molar region, right Ectomolare (°)           |    |      |     |      | 10.6  |      |
|                             | Molar region, right Endomolare (°)           |    |      |     |      | 11.8  |      |
|                             | Molar region, right average (°)              |    |      |     |      | 11.2  |      |
|                             | Molar region, left Ectomolare (°)            |    |      |     |      | 11.8  |      |
|                             | Molar region, left Endomolare (°)            |    |      |     |      | 10.2  |      |
|                             | Molar region, left average (°)               |    |      |     |      | 11    |      |
|                             | Alar nasal width (mm)                        | 91 | 32.9 | 2.8 | 34.1 | 2.9   | 1.2  |
|                             | Alar nasal base width (mm)                   |    | 30.8 | 2.6 | 32.8 | 2.9   | 2.1  |
|                             | Nose Tip Height (mm)                         |    | 27.1 | 2.6 | 27.0 | 2.5   | -0.1 |
|                             | Nasal apertura width (mm)                    |    | 22.5 | 1.6 | 24.1 | 2.2   | 1.5  |
|                             | Nasal width at first molar (mm)              |    | 30.8 | 2.5 | 32.6 | 2.7   | 1.8  |
|                             | Angle of septal deviation (°)                |    | 9.0  | 4.5 | 8.7  | 4.4   | -0.2 |

|                        |                                                     |      |        |       |     |      |      |
|------------------------|-----------------------------------------------------|------|--------|-------|-----|------|------|
| Xi et al.<br>(2017)    | Vertical palate height at first molars (mm)         | 21.6 | 2.5    | 21.5  | 2.6 | -0.1 | 1.0  |
|                        | Transversal width at canines (mm)                   | 34.5 | 3.3    | 39.3  | 3.4 | 4.8  | 1.8  |
|                        | Transversal width at first molars (mm)              | 54.1 | 3.8    | 58.0  | 3.6 | 3.8  | 1.4  |
|                        | Dental show (mm)                                    | 78   | (with  | hyrax |     | 2.5  | 2.1  |
|                        |                                                     |      | group) |       |     |      |      |
|                        | Mandibular plane angle (°)                          |      |        |       |     | 1.1  | 1.1  |
|                        | Occlusal plane angle (°)                            |      |        |       |     | 4.9  | 4.7  |
|                        | Vertical changes at A-point (mm)                    |      |        |       |     | 1.6  | 2.3  |
|                        | Vertical changes at pogonion (mm)                   |      |        |       |     | 1.8  | 1.8  |
|                        | Anterior maxillary expansion (mm)                   |      |        |       |     | 1.8  | 1.0  |
| Zandi et<br>al. (2014) | Posterior maxillary expansion (mm)                  |      |        |       |     | 2.6  | 1.8  |
|                        | Chin advancement (mm)                               |      |        |       |     | -1.5 | 2.2  |
|                        | PBW4 - palatal bone width (mm)                      | 15   |        |       |     | 4.53 | 2.02 |
|                        | PBW6 - palatal bone width (mm)                      |      |        |       |     | 4.33 | 1.23 |
|                        | NFW4 - nasal floor width (mm)                       |      |        |       |     | 1.47 | 0.52 |
|                        | NFW6 - nasal floor width (mm)                       |      |        |       |     | 1.33 | 0.49 |
|                        | ICD4 - interdental cusp distance - dental arch (mm) |      |        |       |     | 6.73 | 2.15 |
|                        | ICD6 - interdental cusp distance (mm)               |      |        |       |     | 6.53 | 2.67 |
|                        | IRD4 - interdental root distance (mm)               |      |        |       |     | 4.4  | 1.68 |
|                        | IRD6 - interdental root distance (mm)               |      |        |       |     | 4.5  | 1.83 |
